# Supplementary material
Source: PubMed Central journal article supplement (PMC9463185)
Supplement: 41421_2022_454_MOESM1_ESM.pdf [file 41421_2022_454_MOESM1_ESM.pdf]

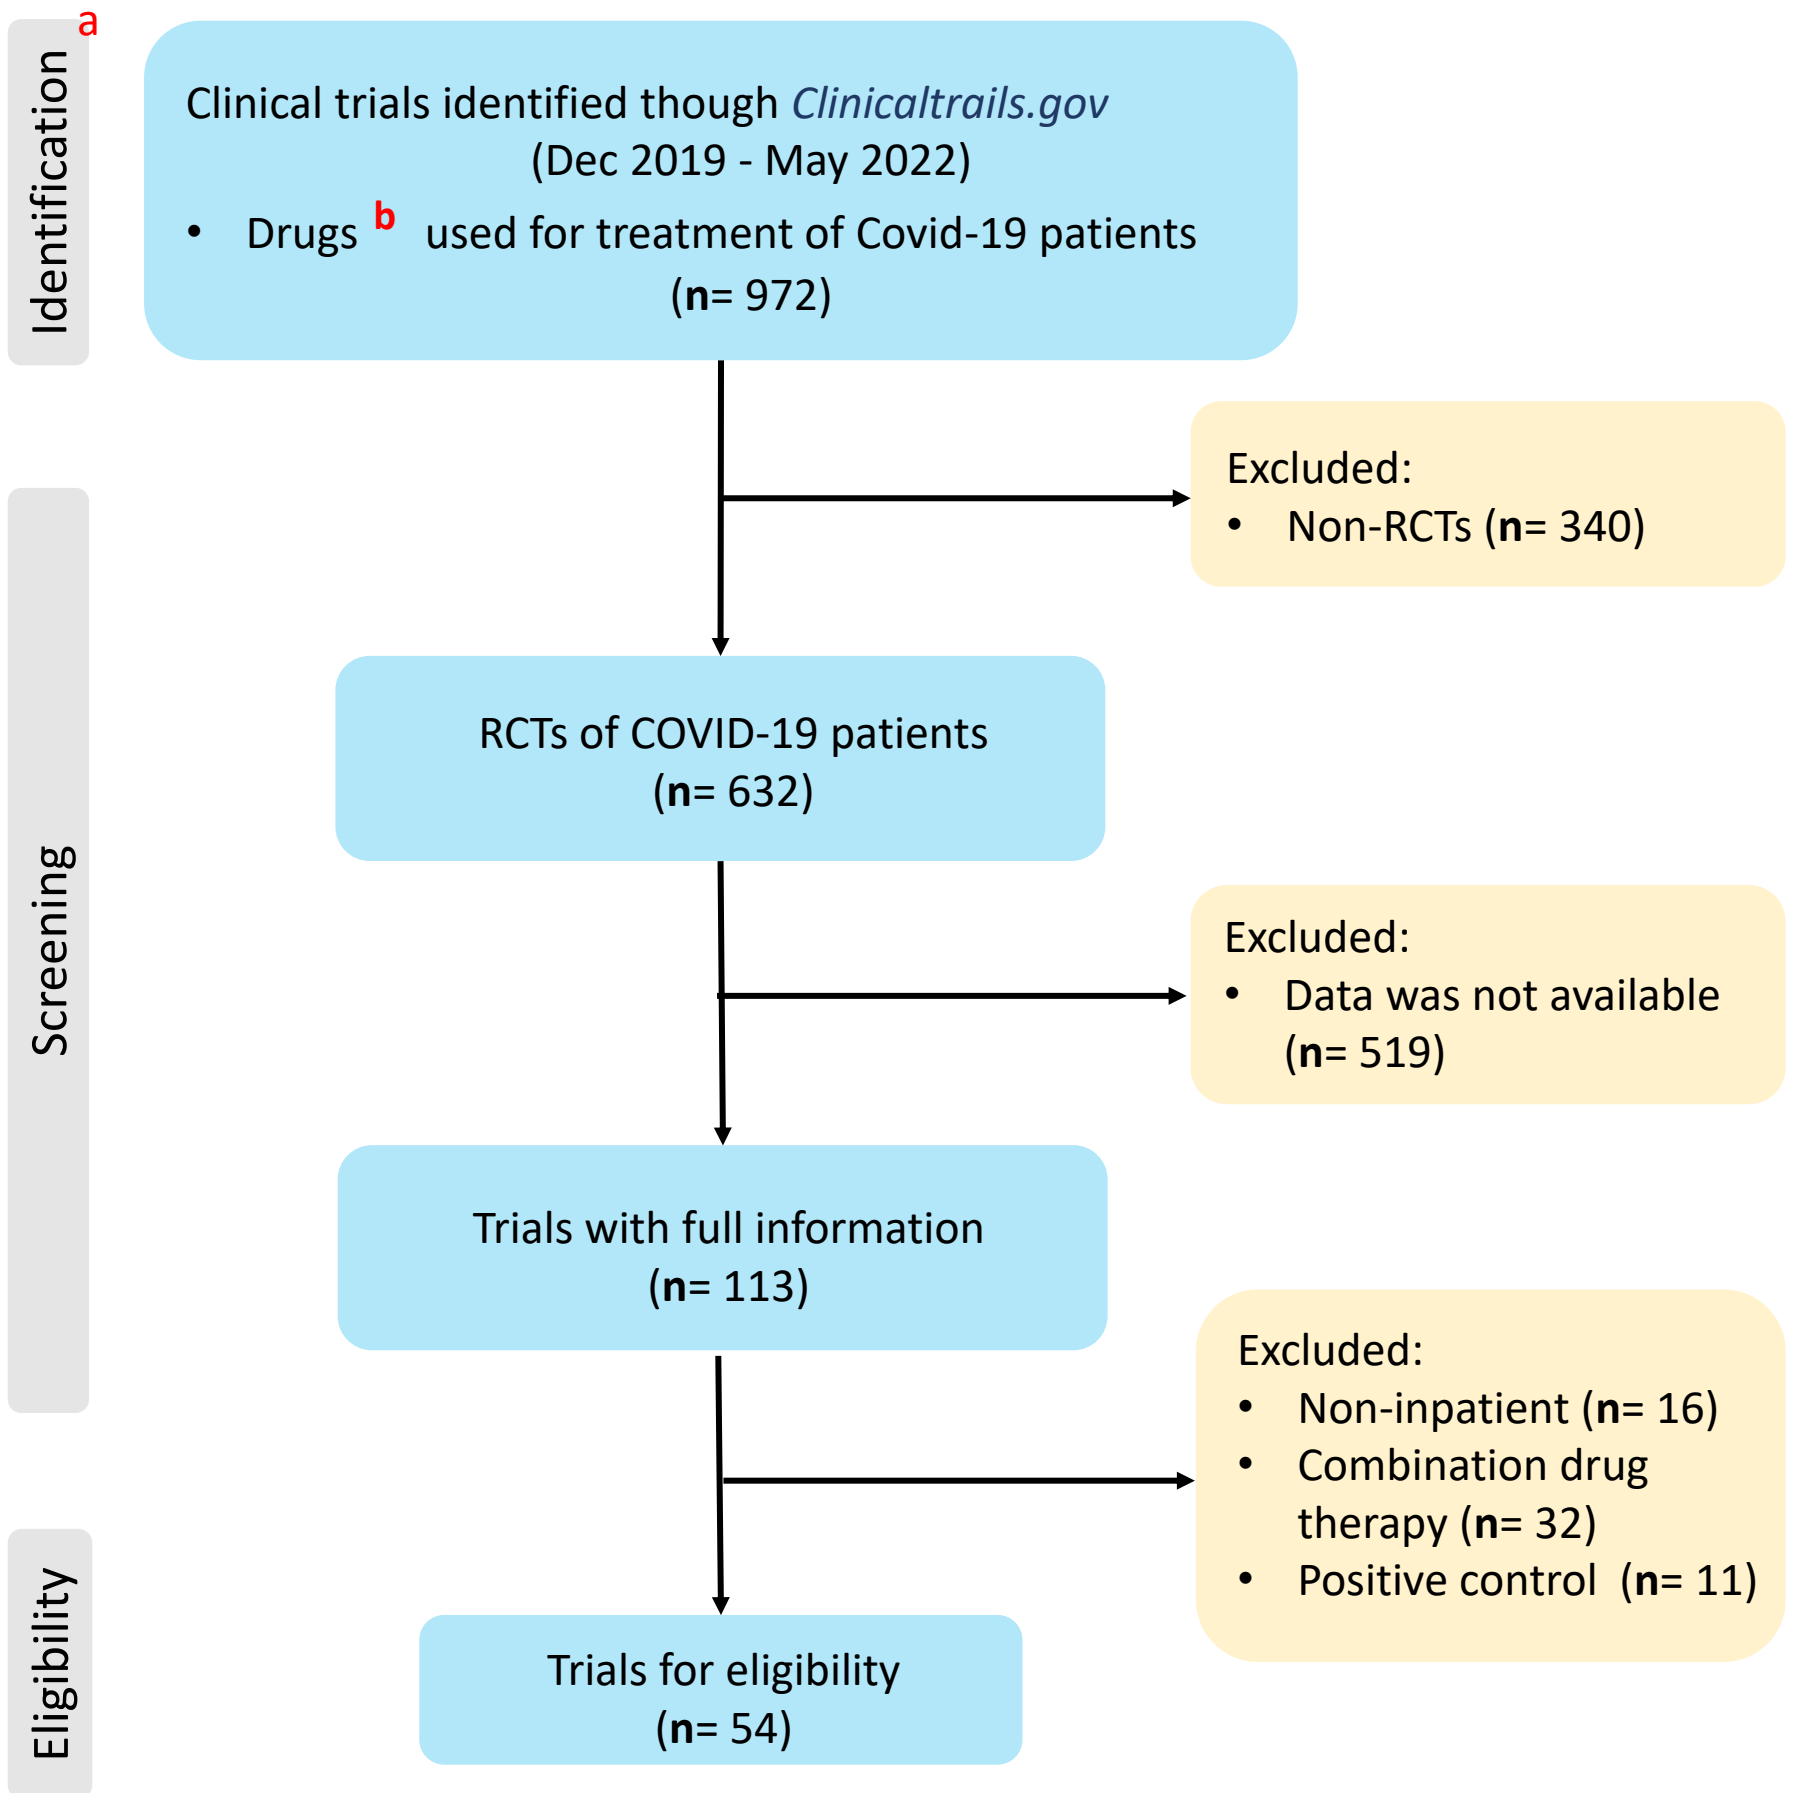

**a** Two authors (C.Y. and X.Y.) independently screened relevant trials.

**b** Drugs used for treatment include Angiotensin receptor blockers (ARB), as well as drugs recommended/emergency use authorized by the Chinese Clinical Guidance for COVID-19 Pneumonia Diagnosis and Treatment (China 9th Edition), the U.S. Food and Drug Administration (FDA), the European Medicines Agency (EMA) and those strongly recommended by the Guideline Therapeutics and COVID-19 of World Health Organization (WHO).

## Dexamethasone

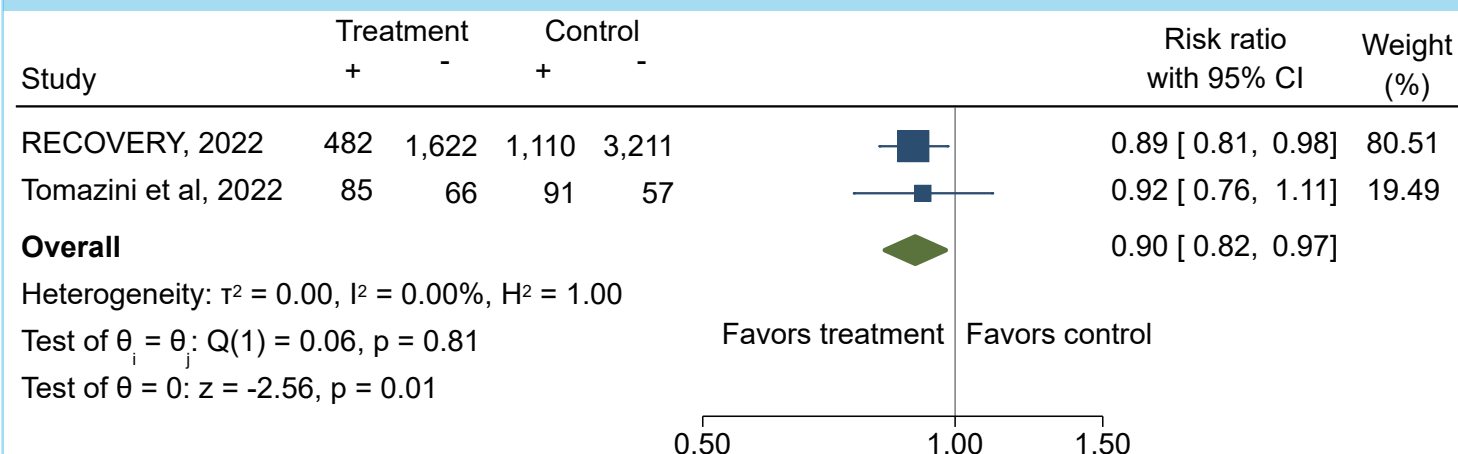

Random-effects DerSimonian–Laird model

## Remdesivir

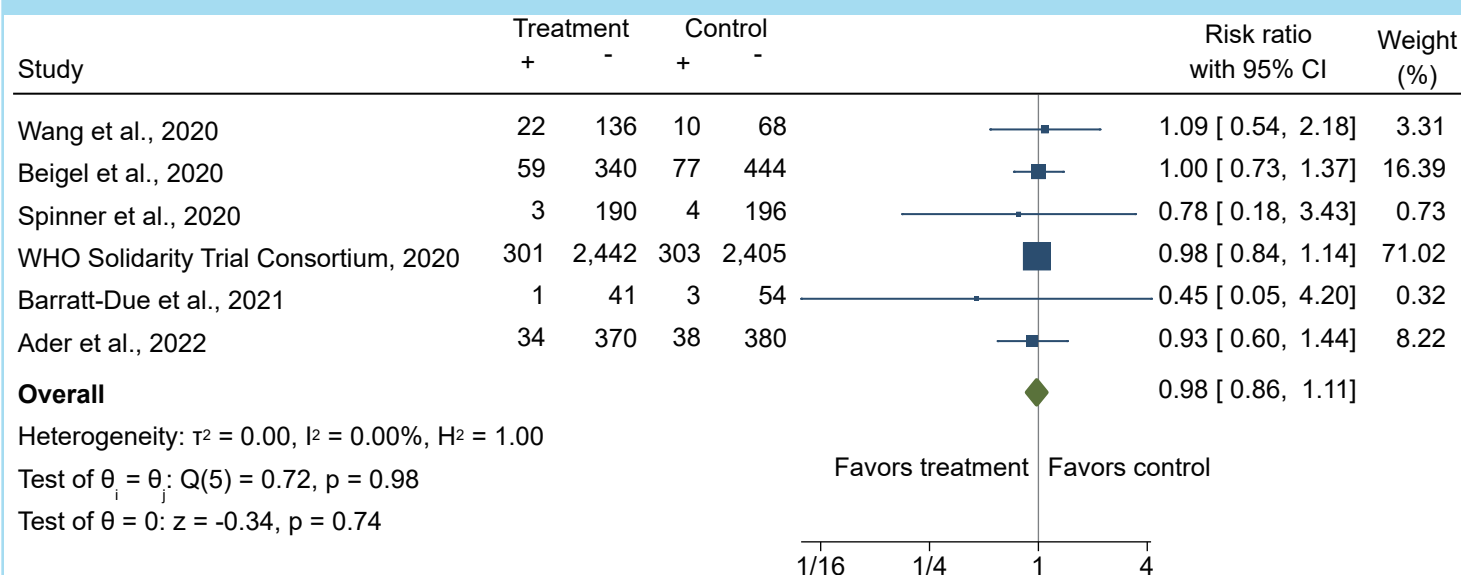

Random-effects DerSimonian–Laird model

## Baricitinib

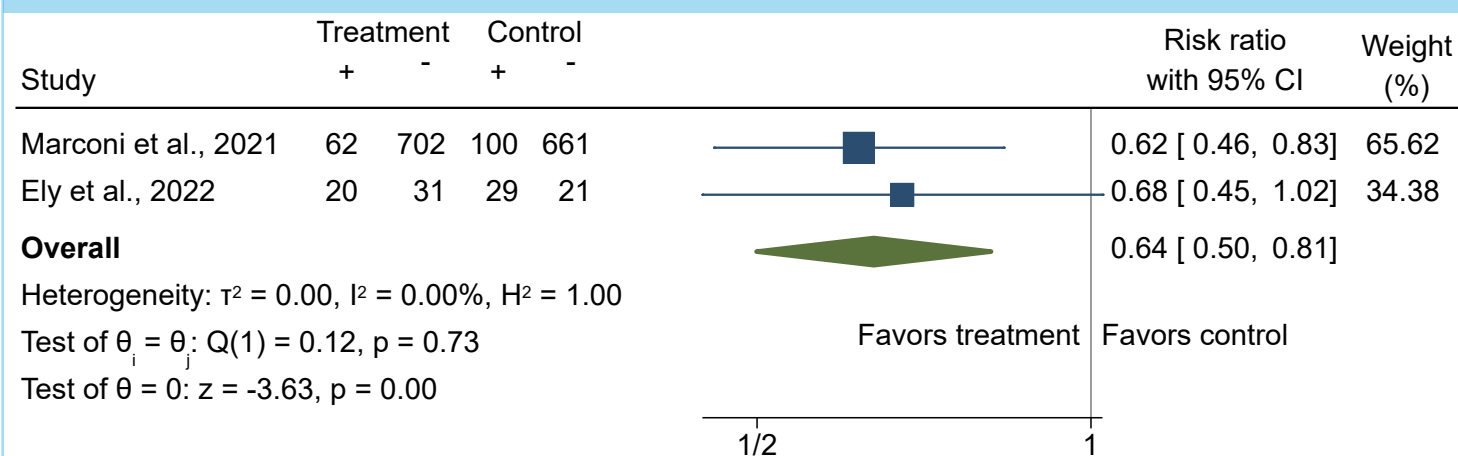

Random-effects DerSimonian–Laird model

## Tocilizumab

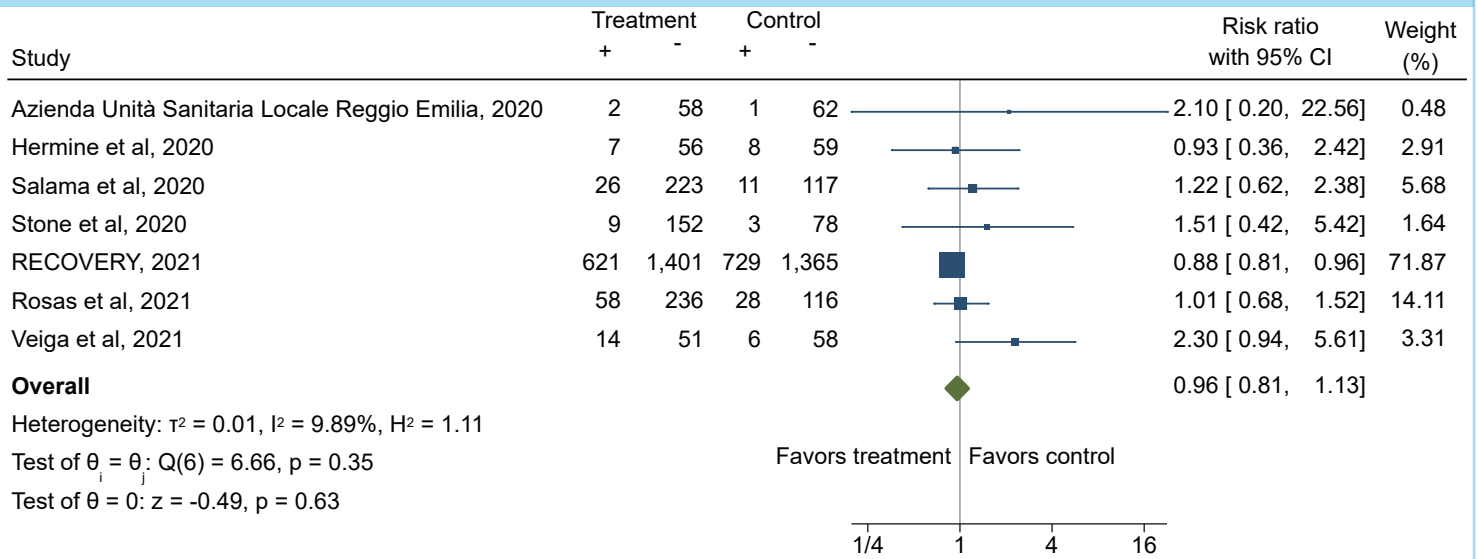

Random-effects DerSimonian–Laird model

## Anakinra

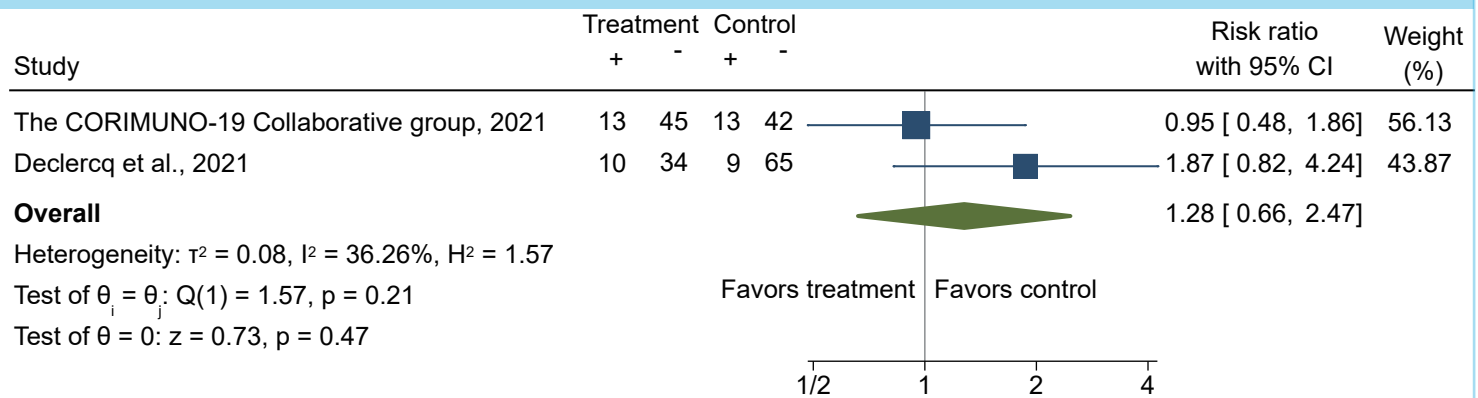

Random-effects DerSimonian–Laird model

## Intravenous Immunoglobulin (IVIG)

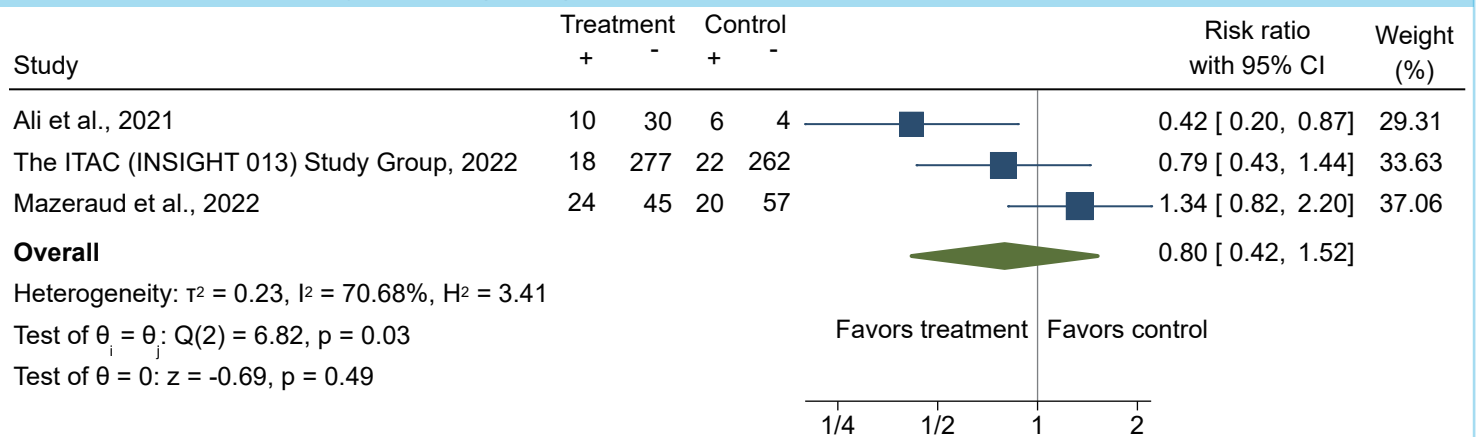

Random-effects DerSimonian–Laird model

## COVID-19 convalescent plasma

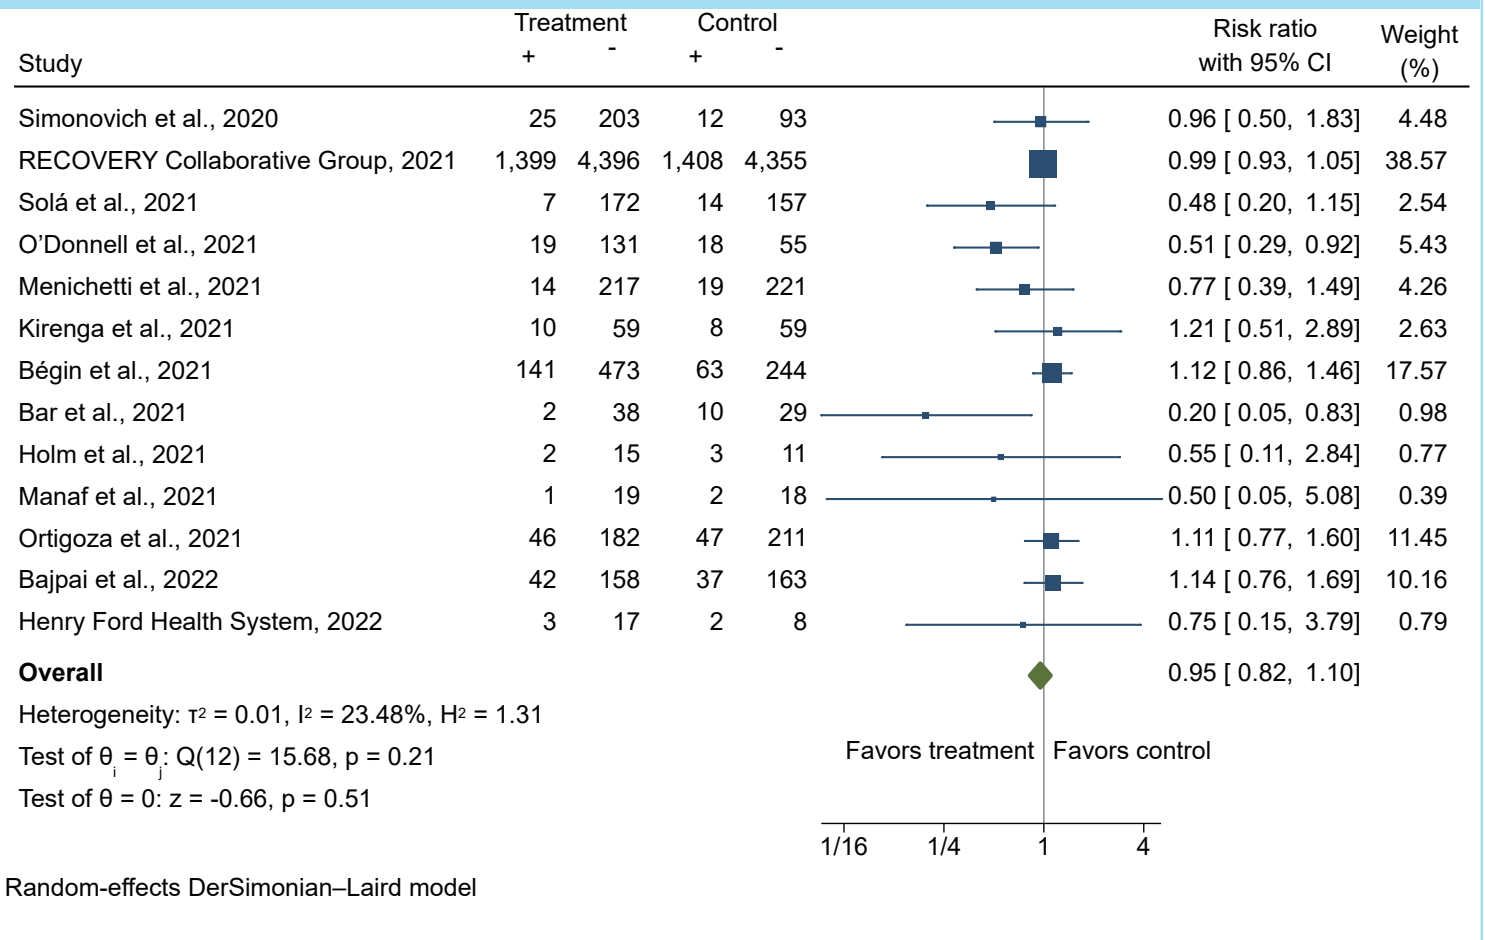

Supplementary Fig. S2 Outcome (28/30-day mortality) and efficacy of different drugs in hospitalized patients with Covid-19 using meta-analysis.

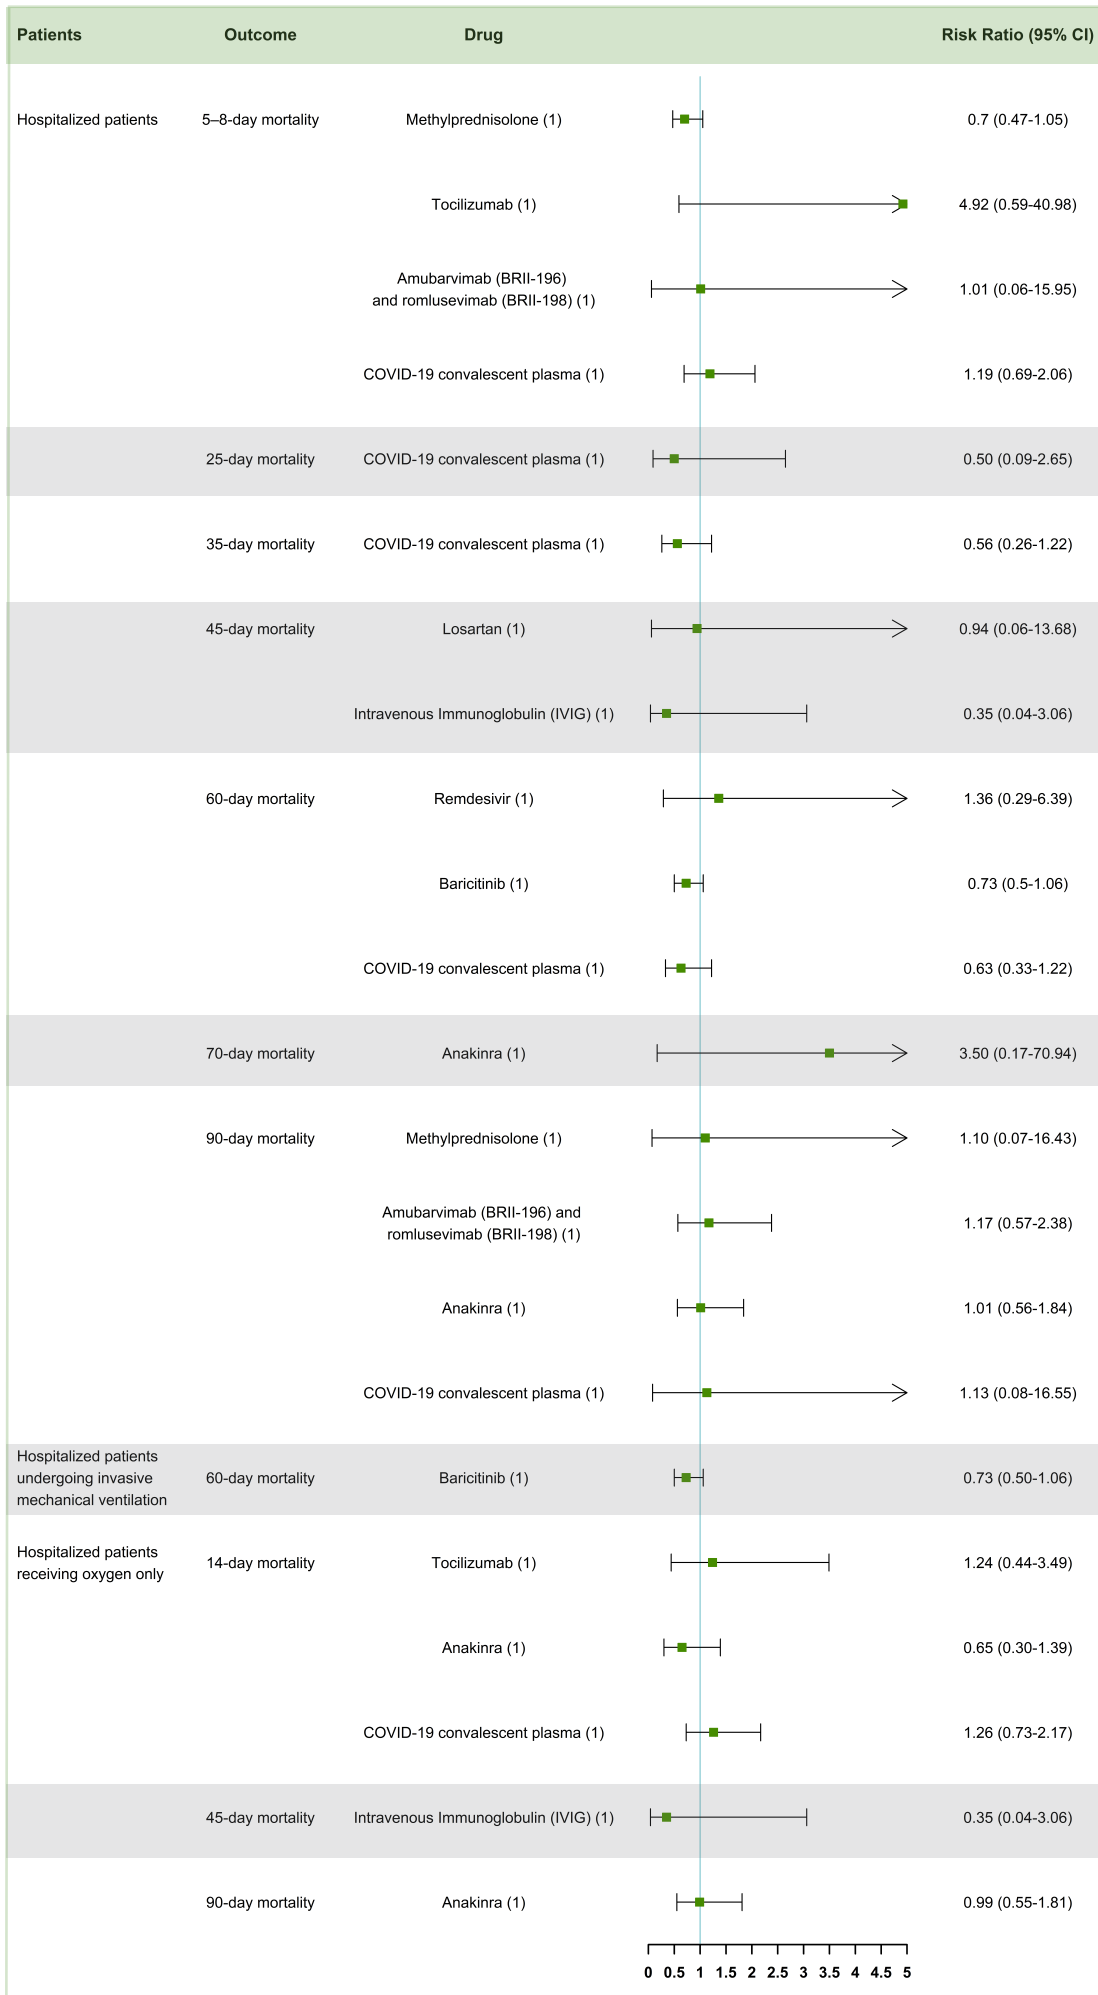

Supplementary Fig. S3 Evidence of absence effect in hospitalized patients with Covid-19.

**Supplementary Table S1. Search strategies.**

| Drug name                                                                  | Other names                                                                                              | Condition or disease in clinicaltrials.gov | Terms in clinicaltrials.gov                                                                                                                                                      | Search results                                                                                                                                                   |
|----------------------------------------------------------------------------|----------------------------------------------------------------------------------------------------------|--------------------------------------------|----------------------------------------------------------------------------------------------------------------------------------------------------------------------------------|------------------------------------------------------------------------------------------------------------------------------------------------------------------|
| ARB                                                                        | Losartan, Telmisartan, Valsartan, Telsartan, Candesartan, Irbesartan, Eprosartan, Olmesartan, Azilsartan | COVID-19                                   | Losartan <b>OR</b> Telmisartan <b>OR</b> Valsartan <b>OR</b> Telsartan <b>OR</b> Candesartan <b>OR</b> Irbesartan <b>OR</b> Eprosartan <b>OR</b> Olmesartan <b>OR</b> Azilsartan | <b>31</b> Studies found for: Losartan OR Telmisartan OR Valsartan OR Telsartan OR Candesartan OR Irbesartan OR Eprosartan OR Olmesartan OR Azilsartan   COVID-19 |
| Dexamethasone                                                              | NA <sup>a</sup>                                                                                          | COVID-19                                   | Dexamethasone                                                                                                                                                                    | <b>105</b> Studies found for: Dexamethasone   COVID-19                                                                                                           |
| Methylprednisolone                                                         | NA                                                                                                       | COVID-19                                   | Methylprednisolone                                                                                                                                                               | <b>73</b> Studies found for: Methylprednisolone   COVID-19                                                                                                       |
| Therapeutic dose of low molecular weight heparin or unfractionated heparin | NA                                                                                                       | COVID-19                                   | Therapeutic dose of low molecular weight heparin or unfractionated heparin <b>OR</b> heparin                                                                                     | <b>112</b> Studies found for: Therapeutic dose of low molecular weight heparin or unfractionated heparin OR heparin   COVID-19                                   |
| Remdesivir                                                                 | GS-5734, Veklury                                                                                         | COVID-19                                   | Remdesivir <b>OR</b> GS-5734 <b>OR</b> Veklury                                                                                                                                   | <b>136</b> Studies found for: Remdesivir OR GS-5734 OR Veklury   COVID-19                                                                                        |
| Baricitinib                                                                | Olumiant, LY3009104                                                                                      | COVID-19                                   | Baricitinib <b>OR</b> Olumiant <b>OR</b> LY3009104                                                                                                                               | <b>27</b> Studies found for: Baricitinib   COVID-19                                                                                                              |
| Sotrovimab                                                                 | VIR-7831, GSK4182136, Xevudy                                                                             | COVID-19                                   | Sotrovimab <b>OR</b> VIR-7831 <b>OR</b> GSK4182136 <b>OR</b> Xevudy                                                                                                              | <b>24</b> Studies found for: Sotrovimab OR VIR-7831 OR GSK4182136 OR Xevudy   COVID-19                                                                           |
| Casirivimab/Imdevimab                                                      | REGEN-COV, Ronapreve, REGN10933/ REGN10987                                                               | COVID-19                                   | Casirivimab <b>OR</b> Imdevimab <b>OR</b> REGEN-COV <b>OR</b> Ronapreve OR REGN10933 OR REGN10987                                                                                | <b>26</b> Studies found for: Casirivimab OR Imdevimab OR REGEN-COV OR Ronapreve OR REGN10933 OR REGN1098   COVID-19                                              |
| Amubarvimab/romlusevimab                                                   | BRII-196 /BRII-198                                                                                       | COVID-19                                   | Amubarvimab <b>OR</b> romlusevimab <b>OR</b> BRII—196 <b>OR</b> BRII—198                                                                                                         | <b>7</b> Studies found for: Amubarvimab OR romlusevimab OR BRII-196 OR BRII-198   COVID-19                                                                       |
| Tocilizumab                                                                | NA                                                                                                       | COVID-19                                   | Tocilizumab <b>OR</b> RoActemra                                                                                                                                                  | <b>101</b> Studies found for: Tocilizumab OR RoActemra   COVID-19                                                                                                |
| Anakinra                                                                   | Kineret                                                                                                  | COVID-19                                   | Anakinra <b>OR</b> Kineret                                                                                                                                                       | <b>40</b> Studies found for: Anakinra OR Kineret   COVID-19                                                                                                      |
| Intravenous Immunoglobulin                                                 | IVIG                                                                                                     | COVID-19                                   | Intravenous Immunoglobulin <b>OR</b> IVIG                                                                                                                                        | <b>89</b> Studies found for: Intravenous Immunoglobulin OR IVIG   COVID-19                                                                                       |
| COVID-19 convalescent plasma                                               | NA                                                                                                       | COVID-19                                   | COVID-19 convalescent plasma                                                                                                                                                     | <b>196</b> Studies found for: COVID-19 convalescent plasma   COVID-19                                                                                            |
| Human COVID-19 immunoglobulin (Ph4) for intravenous injection              | NA                                                                                                       | COVID-19                                   | Human COVID-19 immunoglobulin (Ph4) for intravenous injection                                                                                                                    | <b>2</b> Studies found for: Human COVID-19 immunoglobulin (Ph4) for intravenous injection   COVID-19                                                             |

<sup>a</sup> NA means the drug has no other name

**Supplementary Table S2. The basic characteristics of eligible studies.**

| NO | Study                                                                      | ClinicalTrials.gov Identifier | Experimental group                                                         | Guideline <sup>a</sup> | Control group | Multicenter | Sample size | Availability of patient data |                        |                       | All-cause mortality | Published or Not |
|----|----------------------------------------------------------------------------|-------------------------------|----------------------------------------------------------------------------|------------------------|---------------|-------------|-------------|------------------------------|------------------------|-----------------------|---------------------|------------------|
|    |                                                                            |                               |                                                                            |                        |               |             |             | ICU                          | Mechanical ventilation | Receiving oxygen only |                     |                  |
| 1  | Puskarich et al., 2022                                                     | NCT04312009                   | Losartan                                                                   | NA <sup>b</sup>        | Placebo       | Yes         | 205         | Available                    | Unavailable            | Unavailable           | 28d                 | Yes              |
| 2  | Geriak et al., 2021                                                        | NCT04340557                   | Losartan                                                                   | NA                     | Standard care | Yes         | 31          | Unavailable                  | Unavailable            | Unavailable           | 45d                 | Yes              |
| 3  | Duarte et al., 2021                                                        | NCT04355936                   | Telmisartan                                                                | NA                     | Standard care | Yes         | 158         | Unavailable                  | Unavailable            | Unavailable           | 15d, 30d            | Yes              |
| 4  | Tomazini et al., 2022                                                      | NCT04327401                   | Dexamethasone                                                              | China, WHO             | Standard care | Yes         | 299         | Available                    | Available              | Unavailable           | 28d                 | Yes              |
| 5  | The RECOVERY Collaborative Group, 2020                                     | NCT04381936                   | Dexamethasone                                                              | China, WHO             | Standard care | Yes         | 6425        | Unavailable                  | Available              | Available             | 28d                 | Yes              |
| 6  | Odeyemi et al., 2022                                                       | NCT03852537                   | Methylprednisolone                                                         | China, WHO             | Standard care | No          | 41          | Unavailable                  | Unavailable            | Unavailable           | 90d                 | Yes              |
| 7  | Tang et al., 2021                                                          | NCT04273321                   | Methylprednisolone                                                         | China, WHO             | Placebo       | Yes         | 86          | Unavailable                  | Unavailable            | Unavailable           | 14d                 | Yes              |
| 8  | Christiane Maria Prado Jeronimo, 2020                                      | NCT04343729                   | Methylprednisolone                                                         | China, WHO             | Placebo       | No          | 416         | Unavailable                  | Available              | Available             | 7d, 14d, 28d        | Yes              |
| 9  | The REMAP-CAP, ACTIV-4a, and ATTACC Investigators, 2021                    | NCT04372589                   | Therapeutic dose of low molecular weight heparin or unfractionated heparin | China                  | Standard care | Yes         | 1207        | Available                    | Unavailable            | Unavailable           | 21d                 | Yes              |
| 10 | The ATTACC, ACTIV-4a, and REMAP-CAP Investigators, 2021                    | NCT04372589                   | Therapeutic dose of low molecular weight heparin or unfractionated heparin | China                  | Standard care | Yes         | 2244        | Unavailable                  | Unavailable            | Unavailable           | 21d                 | Yes              |
| 11 | Barratt-Due et al., 2021                                                   | NCT04321616                   | Remdesivir                                                                 | FDA, EMA               | Standard care | Yes         | 366         | Unavailable                  | Unavailable            | Unavailable           | 28, 60d             | Yes              |
| 12 | Wang et al., 2020                                                          | NCT04257656                   | Remdesivir                                                                 | FDA, EMA               | Placebo       | Yes         | 236         | Unavailable                  | Unavailable            | Unavailable           | 28d                 | Yes              |
| 13 | Beigel et al., 2020                                                        | NCT04280705                   | Remdesivir                                                                 | FDA, EMA               | Placebo       | Yes         | 1062        | Unavailable                  | Unavailable            | Unavailable           | 29d                 | Yes              |
| 14 | Spinner et al., 2020                                                       | NCT04292730                   | Remdesivir                                                                 | FDA, EMA               | Standard care | Yes         | 584         | Unavailable                  | Unavailable            | Unavailable           | 28d                 | Yes              |
| 15 | WHO Solidarity Trial Consortium, 2020                                      | NCT04315948                   | Remdesivir                                                                 | FDA, EMA               | Standard care | Yes         | 11330       | Unavailable                  | Available              | Available             | 28d                 | Yes              |
| 16 | Ader et al., 2022                                                          | NCT04315948                   | Remdesivir                                                                 | FDA, EMA               | Standard care | Yes         | 832         | Unavailable                  | Unavailable            | Unavailable           | 29d                 | Yes              |
| 17 | Ely et al., 2022                                                           | NCT04421027                   | Baricitinib                                                                | FDA, WHO               | Standard care | Yes         | 101         | Unavailable                  | Available              | Unavailable           | 28d, 60d            | Yes              |
| 18 | Marconi et al., 2021                                                       | NCT04421027                   | Baricitinib                                                                | FDA, WHO               | Placebo       | Yes         | 1525        | Unavailable                  | Unavailable            | Available             | 28d                 | Yes              |
| 19 | ACTIV-3/Therapeutics for Inpatients with COVID-19 (TICO) Study Group, 2022 | NCT04501978                   | Sotrovimab                                                                 | FDA, EMA               | Placebo       | Yes         | 536         | Unavailable                  | Unavailable            | Unavailable           | 28d                 | Yes              |
| 20 | The RECOVERY Collaborative Group, 2022                                     | NCT04381936                   | REGEN-COV (Casirivimab /Imdevimab)                                         | FDA, EMA, WHO          | Standard care | Yes         | 9785        | Unavailable                  | Available              | Available             | 28d                 | Yes              |
| 21 | ACTIV-3/Therapeutics for Inpatients with COVID-19 (TICO) Study Group, 2022 | NCT04501978                   | Amubarvimab/romlusevimb (BR11-196 /BR11-198)                               | China                  | Placebo       | Yes         | 536         | Unavailable                  | Unavailable            | Unavailable           | 5d, 28d, 90d        | Yes              |

|    |                                           |             |                                                    |                      |               |     |       |             |             |             |               |     |
|----|-------------------------------------------|-------------|----------------------------------------------------|----------------------|---------------|-----|-------|-------------|-------------|-------------|---------------|-----|
| 22 | The RECOVERY Collaborative Group, 2021    | NCT04381936 | Tocilizumab                                        | China, FDA, EMA, WHO | Standard care | No  | 4116  | Unavailable | Available   | Available   | 28d           | Yes |
| 23 | Rosas et al., 2021                        | NCT04320615 | Tocilizumab                                        | China, FDA, EMA, WHO | Placebo       | Yes | 452   | Unavailable | Unavailable | Unavailable | 28d           | Yes |
| 24 | Veiga et al., 2021                        | NCT04403685 | Tocilizumab                                        | China, FDA, EMA, WHO | Standard care | Yes | 129   | Unavailable | Unavailable | Unavailable | 8d, 15d, 28d  | Yes |
| 25 | Declercq et al., 2021                     | NCT04330638 | Tocilizumab                                        | China, FDA, EMA, WHO | Placebo       | Yes | 342   | Unavailable | Unavailable | Unavailable | 15d           | Yes |
| 26 | The REMAP-CAP Investigators, 2021         | NCT02735707 | Tocilizumab                                        | China, FDA, EMA, WHO | Standard care | Yes | 895   | Available   | Unavailable | Unavailable | 21d           | Yes |
| 27 | Salama et al., 2020                       | NCT04372186 | Tocilizumab                                        | China, FDA, EMA, WHO | Standard care | Yes | 388   | Unavailable | Unavailable | Unavailable | 28d           | Yes |
| 28 | Stone et al., 2020                        | NCT04356937 | Tocilizumab                                        | China, FDA, EMA, WHO | Standard care | Yes | 243   | Unavailable | Unavailable | Unavailable | 28d           | Yes |
| 29 | Salvarani et al., 2020                    | NCT04346355 | Tocilizumab                                        | China, FDA, EMA, WHO | Standard care | Yes | 126   | Unavailable | Unavailable | Unavailable | 30d           | Yes |
| 30 | Hermine et al., 2020                      | NCT04331808 | Tocilizumab                                        | EMA, WHO             | Standard care | Yes | 131   | Unavailable | Unavailable | Available   | 14d, 28d      | Yes |
| 31 | Swedish Orphan Biovitrum, 2022            | NCT04324021 | Anakinra                                           | EMA                  | Standard care | Yes | 16    | Unavailable | Unavailable | Unavailable | 70d           | No  |
| 32 | The CORIMUNO-19 Collaborative group, 2021 | NCT04341584 | Anakinra                                           | EMA                  | Standard care | Yes | 116   | Unavailable | Unavailable | Available   | 14d, 28d, 90d | Yes |
| 33 | Declercq et al., 2021                     | NCT04330638 | Anakinra                                           | EMA                  | Placebo       | Yes | 342   | Unavailable | Unavailable | Unavailable | 28d           | Yes |
| 34 | The ITAC (INSIGHT 013) Study Group, 2022  | NCT04546581 | Immunoglobulin (IVIG) Intravenous                  | China                | Placebo       | Yes | 579   | Unavailable | Unavailable | Unavailable | 28d           | Yes |
| 35 | Mazeraud et al., 2022                     | NCT04350580 | Immunoglobulin (IVIG) Intravenous                  | China                | Placebo       | Yes | 146   | Available   | Available   | Unavailable | 28d           | Yes |
| 36 | Sakoulas et al., 2021                     | NCT04411667 | Immunoglobulin (IVIG) Intravenous                  | China                | Standard care | Yes | 33    | Unavailable | Unavailable | Available   | 45d           | No  |
| 37 | Ali et al., 2021                          | NCT04521309 | Immunoglobulin (IVIG) COVID-19 convalescent plasma | China                | Standard care | No  | 50    | Unavailable | Unavailable | Available   | 28d           | Yes |
| 38 | Bajpai et al., 2022                       | NCT04425915 | COVID-19 convalescent plasma                       | China, FDA           | Standard care | Yes | 400   | Unavailable | Unavailable | Unavailable | 7d, 28d       | Yes |
| 39 | Henry Ford Health System, 2022            | NCT04385199 | COVID-19 convalescent plasma                       | China, FDA           | Standard care | No  | 30    | Unavailable | Unavailable | Unavailable | 28d           | No  |
| 40 | The RECOVERY Collaborative Group, 2021    | NCT04381936 | COVID-19 convalescent plasma                       | China, FDA           | Standard care | Yes | 11558 | Unavailable | Available   | Available   | 28d           | Yes |
| 41 | Avendaño-Solá et al., 2021                | NCT04345523 | COVID-19 convalescent plasma                       | China, FDA           | Standard care | Yes | 350   | Unavailable | Unavailable | Unavailable | 14d, 28d      | Yes |
| 42 | Donnell et al., 2021                      | NCT04359810 | COVID-19 convalescent plasma                       | China, FDA           | Placebo       | Yes | 223   | Unavailable | Unavailable | Unavailable | 28d           | Yes |
| 43 | Menichetti et al., 2021                   | NCT04716556 | COVID-19 convalescent plasma                       | China, FDA           | Standard care | Yes | 487   | Unavailable | Unavailable | Unavailable | 30d           | Yes |
| 44 | Libster et al., 2021                      | NCT04479163 | COVID-19 convalescent plasma                       | China, FDA           | Placebo       | Yes | 160   | Unavailable | Unavailable | Unavailable | 25d           | Yes |
| 45 | Hsue et al., 2021                         | NCT04421404 | COVID-19 convalescent plasma                       | China, FDA           | Placebo       | Yes | 34    | Unavailable | Unavailable | Unavailable | 90d           | No  |
| 46 | Kirenga et al., 2021                      | NCT04542941 | COVID-19 convalescent plasma                       | China, FDA           | Standard care | No  | 136   | Unavailable | Unavailable | Unavailable | 28d           | Yes |



|    |                                                              |             |                                 |            |               |     |      |             |             |             |             |     |
|----|--------------------------------------------------------------|-------------|---------------------------------|------------|---------------|-----|------|-------------|-------------|-------------|-------------|-----|
| 47 | Bégin et al., 2021<br>Writing Committee for the<br>REMAP-CAP | NCT04348656 | COVID-19 convalescent<br>plasma | China, FDA | Standard care | Yes | 940  | Unavailable | Unavailable | Unavailable | 30d         | Yes |
| 48 | Investigators, 2021                                          | NCT02735707 | COVID-19 convalescent<br>plasma | China, FDA | Placebo       | Yes | 2011 | Unavailable | Unavailable | Unavailable | 21d         | Yes |
| 49 | Holm et al., 2021                                            | NCT04600440 | COVID-19 convalescent<br>plasma | China, FDA | Standard care | Yes | 33   | Unavailable | Unavailable | Unavailable | 28d         | Yes |
| 50 | Ortigoza et al., 2021                                        | NCT04364737 | COVID-19 convalescent<br>plasma | China, FDA | Placebo       | Yes | 941  | Unavailable | Unavailable | Available   | 14d, 28d    | Yes |
| 51 | Bar et al., 2021                                             | NCT04397757 | COVID-19 convalescent<br>plasma | China, FDA | Standard care | Yes | 79   | Unavailable | Unavailable | Unavailable | 14d, 28     | Yes |
| 52 | Körper et al., 2021                                          | NCT04433910 | COVID-19 convalescent<br>plasma | China, FDA | Standard care | Yes | 105  | Unavailable | Unavailable | Unavailable | 21, 35, 60d | Yes |
| 53 | AlQahtani et al., 2021                                       | NCT04356534 | COVID-19 convalescent<br>plasma | China, FDA | Standard care | No  | 40   | Unavailable | Unavailable | Unavailable | 28d         | Yes |
| 54 | Simonovich et al., 2021                                      | NCT04383535 | COVID-19 convalescent<br>plasma | China, FDA | Placebo       | Yes | 333  | Unavailable | Unavailable | Unavailable | 30d         | Yes |

<sup>a</sup> China: the Chinese Clinical Guidance for COVID-19 Pneumonia Diagnosis and Treatment (China 9th Edition); FDA: the U.S. Food and Drug Administration; EMA: the European Medicines Agency; WHO: the Guideline for Therapeutics and COVID-19 of World Health Organization (WHO).

<sup>b</sup> NA means the drug was not included in any guideline.
